# Supplementary material for: Cardiac symptom attribution and knowledge of the symptoms of acute myocardial infarction: a systematic review
Source: Springer Nature journal article supplement (doi:10.1186/s12872-020-01714-8), 2020-10-14
Supplement: MOESM1 [file 18484062]

## **SUPPLEMENTAL MATERIAL**

### **Expanded Methods**

#### Search algorithms used for literature search:

##### PubMed:

"myocardial infarction"[mesh] AND ("chest pain" OR symptom\* OR "warning signs") AND ("recognition" OR "awareness" OR interpretation\* OR perception\* OR incongruence\* OR congruence\* OR expectation\* OR "knowledge" OR "understanding" OR "community intervention" OR "educational intervention" OR campaign\*)

➔ Restrictions: Since 01/01/2008, in English or German, studies on humans

##### CINAHL:

(MW myocardial infarction) AND (TX chest pain OR TX symptom\* OR TX warning sign\*) AND (TX recognition OR TX awareness OR TX interpretation\* OR TX perception\* OR TX incongruence\* OR TX congruence\* OR TX expectation\* OR TX knowledge OR TX understanding OR TX community intervention\* OR TX educational intervention\* OR TX campaign\*)

➔ Restrictions: Since 2008, in English or German, studies on humans

##### EMBASE:

'heart infarction'/exp/mj AND ('chest pain':ab,ti OR 'symptom\*':ab,ti OR 'warning sign\*':ab,ti) AND ('recognition':ab,ti OR 'awareness':ab,ti OR 'interpretation\*':ab,ti OR 'perception\*':ab,ti OR 'incongruence\*':ab,ti OR 'congruence\*':ab,ti OR 'expectation\*':ab,ti OR 'knowledge':ab,ti OR 'understanding':ab,ti OR 'community intervention\*':ab,ti OR 'educational intervention\*':ab,ti OR 'campaign\*':ab,ti) AND [2008-2019]/py AND ([english]/lim OR [german]/lim) AND [humans]/lim

Cochrane Library:

#1: MeSH descriptor: [Myocardial Infarction] explode all trees

#2: ("chest pain" or symptom\* or "warning signs") and ("recognition" or "awareness" or interpretation\* or perception\* or incongruence\* or congruence\* or expectation\* or "knowledge" or "understanding" or "community intervention" or "educational intervention" or campaign\*)

#3: #1 and #2

➔ Restriction: Since 2008

## **Supplemental Figures and Figure Legends**

**Additional Figure 1. Frequencies of countries.**

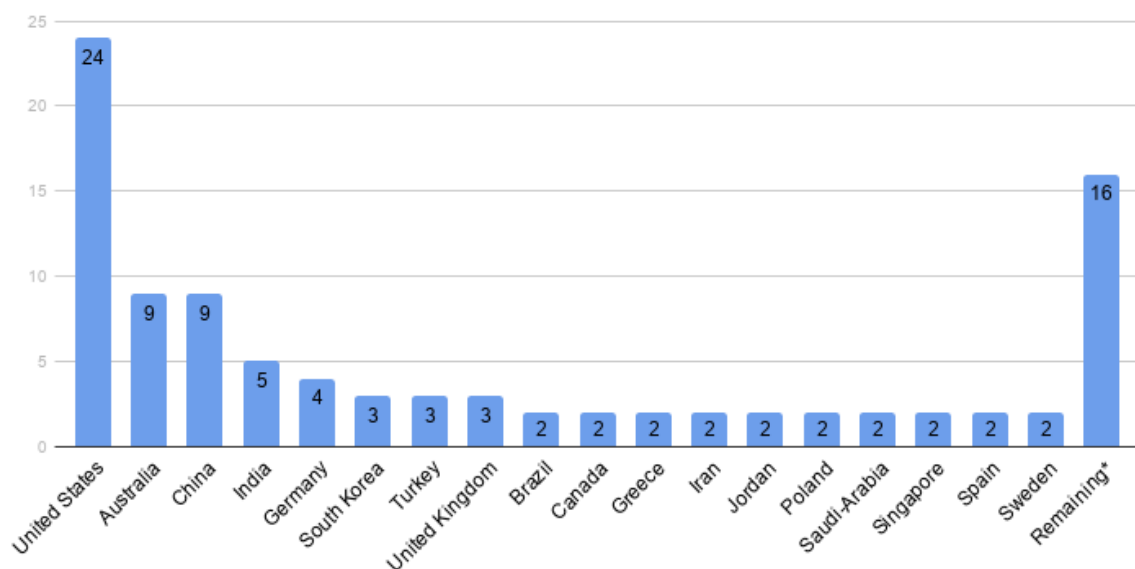

Bar chart with number of samples from each country on y-axis. When a study took place in more than one country, we counted one sample for each country where the participants were located. \*The remaining countries have one sample each.
